# Supplementary material for: Whole Transcriptome RNA-Seq Analysis of Breast Cancer Recurrence Risk Using Formalin-Fixed Paraffin-Embedded Tumor Tissue
Source: PLoS One. 2012 Jul 13;7(7):e40092. doi: 10.1371/journal.pone.0040092 (PMC3396611; doi:10.1371/journal.pone.0040092)
Supplement: Table S8 — Intergenic Region Locations Identified as Associated with Risk of Breast Cancer Recurrence in 136 Breast Cancer Patients. (XLSX) [file pone.0040092.s011.xlsx]

## Sheet: Sheet1
		Table S8. Intergenic Region Locations Identified as Associated with Risk of Breast Cancer Recurrence in 136 Breast Cancer Patients
Region0	Region19	Region	Chromo-some	Start	Stop	In Khalil et al	KQ Parity		Direction of Association (1 = Higher Expression Means Higher Risk)	p-value	Standard- ized Hazard Ratio	Lower Limit	Upper Limit	Standardized Hazard Ratio Estimate (95% Confidence Interval)	q-value (FDR)	Maximum Lower Bound Std HR @ 10% FDR	Regression-to-the- Mean- Corrected Std HR
1	1	1	chr10	37544879	37547649				-1	0.000201405	0.510944	0.3586	0.72801	0.51 (0.36, 0.73)	0.019489	1.06396	1.43176
1	1	1	chr10	37619993	37623136				-1	0.000214688	0.517143	0.364711	0.733285	0.52 (0.36, 0.73)	0.019489	1.06396	1.42937
1	1	1	chr10	37568808	37569830				-1	0.000207046	0.531484	0.380609	0.742166	0.53 (0.38, 0.74)	0.019489	1.06396	1.42838
1	1	1	chr10	37564164	37565625				-1	0.000296369	0.524455	0.369731	0.743927	0.52 (0.37, 0.74)	0.019489	1.06396	1.41964
1	1	1	chr10	37568381	37568752				-1	0.000349909	0.5311	0.375419	0.751339	0.53 (0.38, 0.75)	0.019489	1.06396	1.41425
1	1	1	chr10	37565983	37566523				-1	0.000407208	0.528107	0.370683	0.752388	0.53 (0.37, 0.75)	0.019489	1.06396	1.4103
1	1	1	chr10	37565659	37565893				-1	0.000384637	0.542015	0.386523	0.76006	0.54 (0.39, 0.76)	0.019489	1.06396	1.41017
1	1	1	chr10	37566868	37567570				-1	0.000466797	0.536728	0.378775	0.760549	0.54 (0.38, 0.76)	0.019489	1.06396	1.40552
1	1	1	chr10	37536807	37542809				-1	0.00046374	0.53892	0.381258	0.761782	0.54 (0.38, 0.76)	0.019489	1.06396	1.40544
1	1	1	chr10	37543796	37544843				-1	0.000421965	0.555748	0.400925	0.770357	0.56 (0.40, 0.77)	0.019489	1.06396	1.40527
1	1	1	chr10	37561599	37562256				-1	0.000451884	0.548121	0.391718	0.766971	0.55 (0.39, 0.77)	0.019489	1.06396	1.40484
1	1	1	chr10	37683049	37685772				-1	0.000450752	0.549136	0.392875	0.767549	0.55 (0.39, 0.77)	0.019489	1.06396	1.40474
1	1	1	chr10	37556000	37560492				-1	0.000487654	0.535842	0.377359	0.760886	0.54 (0.38, 0.76)	0.019489	1.06396	1.40438
1	1	1	chr10	37575273	37575491				-1	0.000483277	0.539433	0.381407	0.762932	0.54 (0.38, 0.76)	0.019489	1.06396	1.40422
1	1	1	chr10	37524962	37527301				-1	0.000479889	0.54293	0.385346	0.764955	0.54 (0.39, 0.76)	0.019489	1.06396	1.40397
1	1	1	chr10	37576187	37605418				-1	0.000497488	0.535843	0.377157	0.761296	0.54 (0.38, 0.76)	0.019489	1.06396	1.40381
1	1	1	chr10	37571872	37573979				-1	0.000522561	0.53401	0.374639	0.761178	0.53 (0.37, 0.76)	0.019489	1.06396	1.40259
1	1	1	chr10	37698051	37701722		37687488	37795808	-1	0.000471842	0.560747	0.405441	0.775542	0.56 (0.41, 0.78)	0.019489	1.06396	1.40134
1	1	1	chr10	37672851	37673126				-1	0.000583841	0.508138	0.345473	0.747392	0.51 (0.35, 0.75)	0.019489	1.06396	1.40037
1	1	1	chr10	37562687	37562938				-1	0.000579762	0.531156	0.370431	0.761618	0.53 (0.37, 0.76)	0.019489	1.06396	1.39981
1	1	1	chr10	37527343	37532088				-1	0.000581025	0.53975	0.379858	0.766944	0.54 (0.38, 0.77)	0.019489	1.06396	1.39896
1	1	1	chr10	37560679	37560951				-1	0.000591577	0.535507	0.374992	0.76473	0.54 (0.37, 0.76)	0.019489	1.06396	1.39886
1	1	1	chr10	37570039	37571493				-1	0.00057167	0.549001	0.390297	0.772236	0.55 (0.39, 0.77)	0.019489	1.06396	1.39826
1	1	1	chr10	37575935	37576119				-1	0.000593027	0.541664	0.38176	0.768545	0.54 (0.38, 0.77)	0.019489	1.06396	1.39817
1	1	1	chr10	37609308	37613953				-1	0.000640587	0.542783	0.38218	0.770875	0.54 (0.38, 0.77)	0.0195562	1.06396	1.39584
1	1	1	chr10	37547787	37555941				-1	0.000644412	0.544703	0.384247	0.772164	0.54 (0.38, 0.77)	0.0195562	1.06396	1.39545
1	1	1	chr10	37571633	37571823				-1	0.000649168	0.548057	0.3879	0.774341	0.55 (0.39, 0.77)	0.0195562	1.06396	1.39483
1	1	1	chr10	37667401	37672780				-1	0.00068042	0.548525	0.387915	0.775633	0.55 (0.39, 0.78)	0.0196778	1.06396	1.39344
1	1	1	chr10	37696906	37697533		37687488	37795808	-1	0.00073493	0.524637	0.36077	0.762934	0.52 (0.36, 0.76)	0.0204367	1.06396	1.39302
1	1	1	chr10	37574016	37574684				-1	0.000671259	0.562993	0.404318	0.783941	0.56 (0.40, 0.78)	0.0196778	1.0629	1.39159
1	1	1	chr10	37567627	37568328				-1	0.000720445	0.564662	0.405443	0.786408	0.56 (0.41, 0.79)	0.0204267	1.06184	1.38938
1	1	1	chr10	37693467	37695809		37687488	37795808	-1	0.00076778	0.56222	0.401977	0.786342	0.56 (0.40, 0.79)	0.0209474	1.06184	1.38807
1	1	1	chr10	37654871	37660982				-1	0.000823646	0.560115	0.398814	0.786653	0.56 (0.40, 0.79)	0.0215868	1.06184	1.38646
1	1	1	chr10	37661152	37667368				-1	0.000890225	0.55138	0.388114	0.783327	0.55 (0.39, 0.78)	0.0215868	1.06184	1.38539
1	1	1	chr10	37532337	37536539				-1	0.000820088	0.569999	0.410082	0.792278	0.57 (0.41, 0.79)	0.0215868	1.06184	1.38489
1	1	1	chr10	37562300	37562581				-1	0.000942753	0.557954	0.394837	0.788459	0.56 (0.39, 0.79)	0.0217026	1.06078	1.38295
1	1	1	chr10	37624793	37626867				-1	0.000975707	0.550979	0.386606	0.785239	0.55 (0.39, 0.79)	0.0220449	1.06078	1.38276
1	1	1	chr10	37639567	37654034				-1	0.000877764	0.572689	0.41239	0.795297	0.57 (0.41, 0.80)	0.0215868	1.06078	1.38254
1	1	1	chr10	37561214	37561565				-1	0.00102598	0.552953	0.388227	0.787572	0.55 (0.39, 0.79)	0.0222378	1.06078	1.38108
1	1	1	chr10	37673162	37677786				-1	0.000884157	0.586781	0.42855	0.803434	0.59 (0.43, 0.80)	0.0215868	1.06078	1.37921
1	1	1	chr10	37701753	37702125		37687488	37795808	-1	0.00114819	0.540528	0.373045	0.783204	0.54 (0.37, 0.78)	0.0233842	1.05971	1.37862
1	1	1	chr10	37626921	37629035				-1	0.00104537	0.569325	0.406526	0.797321	0.57 (0.41, 0.80)	0.0222378	1.05971	1.37836
1	1	1	chr10	37695882	37696129		37687488	37795808	-1	0.00117776	0.541527	0.373843	0.784425	0.54 (0.37, 0.78)	0.0236534	1.05971	1.37779
1	1	1	chr10	37654201	37654768				-1	0.00103072	0.578008	0.416643	0.801869	0.58 (0.42, 0.80)	0.0222378	1.05971	1.37718
1	1	1	chr10	37685838	37687256		37687488	37795808	-1	0.00108713	0.574127	0.411555	0.800918	0.57 (0.41, 0.80)	0.0227825	1.05971	1.37646
1	1	1	chr10	37732968	37734110		37687488	37795808	-1	0.00127245	0.545054	0.376808	0.788422	0.55 (0.38, 0.79)	0.0238956	1.05971	1.37521
1	1	1	chr10	37563652	37564121				-1	0.00122852	0.569701	0.405018	0.801347	0.57 (0.41, 0.80)	0.0238882	1.0576	1.37376
1	1	1	chr10	37614131	37619802				-1	0.00125554	0.565378	0.399825	0.799481	0.57 (0.40, 0.80)	0.0238882	1.0576	1.37374
1	1	1	chr10	37566588	37566765				-1	0.00141284	0.561339	0.393771	0.800214	0.56 (0.39, 0.80)	0.024734	1.05654	1.37074
1	1	1	chr10	37632316	37633017				-1	0.00135806	0.575952	0.410944	0.807217	0.58 (0.41, 0.81)	0.0244013	1.05654	1.36995
1	1	1	chr10	37633094	37639262				-1	0.00141973	0.580549	0.415688	0.810794	0.58 (0.42, 0.81)	0.024734	1.05443	1.36793
1	1	1	chr10	37689902	37693366		37687488	37795808	-1	0.00147108	0.583135	0.418233	0.813056	0.58 (0.42, 0.81)	0.0253236	1.05338	1.36648
1	1	1	chr10	37623556	37624754				-1	0.0016934	0.56991	0.401189	0.809586	0.57 (0.40, 0.81)	0.0284728	1.05127	1.3644
1	1	1	chr10	37707161	37714709		37687488	37795808	-1	0.00176318	0.577045	0.408848	0.814438	0.58 (0.41, 0.81)	0.0289722	1.05022	1.3623
1	1	1	chr10	37687488	37689827		37687488	37795808	-1	0.00171598	0.586274	0.419895	0.81858	0.59 (0.42, 0.82)	0.0285208	1.05022	1.36162
1	1	1	chr10	37629082	37632280				-1	0.00198808	0.586792	0.418534	0.822692	0.59 (0.42, 0.82)	0.0319418	1.04603	1.35736
1	1	1	chr10	37575553	37575759				-1	0.00197575	0.591157	0.423717	0.824764	0.59 (0.42, 0.82)	0.0319418	1.04603	1.35678
1	1	1	chr10	37677954	37682763				-1	0.00205157	0.596659	0.429667	0.828552	0.60 (0.43, 0.83)	0.0325996	1.04498	1.35469
1	1	1	chr10	37563315	37563610				-1	0.00231815	0.576544	0.404524	0.821713	0.58 (0.40, 0.82)	0.0354397	1.04394	1.35422
1	1	1	chr10	37575794	37575896				-1	0.00252708	0.539132	0.361053	0.805043	0.54 (0.36, 0.81)	0.0369107	1.04394	1.35299
1	1	1	chr10	37542848	37543623				-1	0.00229395	0.587459	0.417335	0.826933	0.59 (0.42, 0.83)	0.0354397	1.04289	1.35312
1	1	1	chr10	37561067	37561175				-1	0.00270491	0.555232	0.378009	0.815543	0.56 (0.38, 0.82)	0.0384357	1.04185	1.3507
1	1	1	chr10	37734169	37740911				-1	0.00232833	0.608076	0.441459	0.837579	0.61 (0.44, 0.84)	0.0354397	1.04185	1.3488
1	1	1	chr10	37702517	37707119				-1	0.00274731	0.605392	0.435897	0.840794	0.61 (0.44, 0.84)	0.0384357	1.03769	1.34483
1	1	1	chr10	37605587	37609120				-1	0.00272606	0.611283	0.44305	0.843397	0.61 (0.44, 0.84)	0.0384357	1.03769	1.3438
1	1	1	chr10	37562986	37563198				-1	0.0035648	0.600322	0.425932	0.846112	0.60 (0.43, 0.85)	0.045517	1.03149	1.33819
1	1	1	chr10	37740954	37745137				-1	0.00387402	0.603759	0.428704	0.850295	0.60 (0.43, 0.85)	0.0482917	1.02942	1.33518
1	1	1	chr10	37716056	37717321				-1	0.00393301	0.613349	0.439955	0.855081	0.61 (0.44, 0.86)	0.048608	1.02942	1.3331
1	1	1	chr10	37639364	37639473				-1	0.00469938	0.580793	0.398487	0.846503	0.58 (0.40, 0.85)	0.0535824	1.02634	1.33143
1	1	1	chr10	37728632	37731719				-1	0.00487164	0.611833	0.434606	0.861331	0.61 (0.43, 0.86)	0.0541876	1.02532	1.32707
1	1	1	chr10	37717419	37728598				-1	0.00478119	0.62236	0.44768	0.865198	0.62 (0.45, 0.87)	0.0535938	1.02532	1.32574
1	1	1	chr10	37731776	37732927				-1	0.0053039	0.603969	0.423708	0.86092	0.60 (0.42, 0.86)	0.0568107	1.02327	1.32553
1	1	1	chr10	37747085	37748228				-1	0.00711969	0.601355	0.415217	0.870938	0.60 (0.42, 0.87)	0.0693105	1.01511	1.31626
1	1	1	chr10	37714745	37715803				-1	0.00867244	0.619622	0.433411	0.885836	0.62 (0.43, 0.89)	0.0774096	1.01005	1.30799
1	1	1	chr10	37696547	37696778				-1	0.0103477	0.576792	0.378737	0.878417	0.58 (0.38, 0.88)	0.0864898	1.00602	1.30344
1	1	1	chr10	37750435	37752430				-1	0.0112503	0.612112	0.418798	0.894657	0.61 (0.42, 0.89)	0.0908827	1.00401	1.2999
1	1	1	chr10	37745221	37746267				-1	0.0131294	0.600353	0.401141	0.898497	0.60 (0.40, 0.90)	0.0983682	1	1.29476
1	1	1	chr10	37697835	37697938				-1	0.0131051	0.582468	0.380042	0.892714	0.58 (0.38, 0.89)	0.0983682	1	1.29459
2	2	2	chr13	33913029	33915362	Y	33876004	33959236	-1	1.49236e-06	0.528996	0.408149	0.685625	0.53 (0.41, 0.69)	0.00107898	1.11293	1.53176
2	2	2	chr13	33895486	33899980	Y	33876004	33959236	-1	9.61075e-05	0.45071	0.301975	0.672703	0.45 (0.30, 0.67)	0.0173714	1.07037	1.45369
2	2	2	chr13	33861025	33870309	Y			-1	0.000247712	0.432276	0.276028	0.676969	0.43 (0.28, 0.68)	0.019489	1.06396	1.42092
2	2	2	chr13	33885431	33895429	Y			-1	0.00024973	0.431093	0.2748	0.676279	0.43 (0.27, 0.68)	0.019489	1.06396	1.42042
2	2	2	chr13	33905649	33907334	Y			-1	0.000376467	0.455671	0.295469	0.702732	0.46 (0.30, 0.70)	0.019489	1.06396	1.41071
2	2	2	chr13	33875986	33880221	Y			-1	0.000530989	0.469743	0.306358	0.720265	0.47 (0.31, 0.72)	0.019489	1.06396	1.40102
3	3	3	chr14	100492181	100494055		100459666	100513107	-1	3.14231e-05	0.543585	0.407968	0.724282	0.54 (0.41, 0.72)	0.00802989	1.07358	1.46878
3	3	3	chr14	100490070	100492136				-1	0.000461032	0.606598	0.458577	0.802398	0.61 (0.46, 0.80)	0.019489	1.06396	1.38775
3	3	3	chr14	100488826	100489839				-1	0.00124899	0.539657	0.371056	0.784869	0.54 (0.37, 0.78)	0.0238882	1.05971	1.37604
3	3	3	chr14	100452553	100453714				-1	0.00130848	0.567165	0.401349	0.801489	0.57 (0.40, 0.80)	0.0242573	1.05654	1.37231
3	3	3	chr14	100480756	100482681				-1	0.00113579	0.636384	0.484746	0.835458	0.64 (0.48, 0.84)	0.0233842	1.05443	1.35639
3	3	3	chr14	100513361	100516723				-1	0.00211059	0.558219	0.384929	0.809523	0.56 (0.38, 0.81)	0.0331729	1.04603	1.35863
3	3	3	chr14	100522353	100526500				-1	0.0032722	0.556769	0.376862	0.822561	0.56 (0.38, 0.82)	0.0434092	1.03562	1.34432
3	3	3	chr14	100494916	100500335				-1	0.00432508	0.539076	0.352635	0.82409	0.54 (0.35, 0.82)	0.0525551	1.02942	1.33405
3	3	3	chr14	100482810	100488781				-1	0.00448979	0.559042	0.374319	0.834923	0.56 (0.37, 0.83)	0.0527824	1.0284	1.33344
3	3	3	chr14	100500384	100505674				-1	0.00473956	0.558806	0.373134	0.83687	0.56 (0.37, 0.84)	0.0535824	1.02634	1.33153
3	3	3	chr14	100505745	100509590				-1	0.00577623	0.589557	0.405119	0.857965	0.59 (0.41, 0.86)	0.0600894	1.02224	1.32405
3	3	3	chr14	100510107	100513108				-1	0.00731959	0.590775	0.40214	0.867894	0.59 (0.40, 0.87)	0.0693105	1.0141	1.31593
3	3	3	chr14	100494179	100494879				-1	0.00730749	0.629119	0.448411	0.88265	0.63 (0.45, 0.88)	0.0693105	1.0141	1.31199
3	3	3	chr14	100466798	100467228				-1	0.00705538	0.680992	0.514941	0.900588	0.68 (0.51, 0.90)	0.0693105	1.0141	1.29837
3	3	3	chr14	100509621	100510070				-1	0.012095	0.651399	0.466069	0.910425	0.65 (0.47, 0.91)	0.0950513	1.002	1.29263
4	4	4	chr15	50998590	50999355				1	5.34686e-08	1.46081	1.27434	1.67457	1.46 (1.27, 1.67)	7.73155e-05	1.11293	1.36157
4	4	4	chr15	50995854	50996481				1	0.00163432	1.55719	1.1821	2.05131	1.56 (1.18, 2.05)	0.0278027	1.04603	1.24575
5	5	5	chr15	71427690	71430497				-1	0.00459063	0.615099	0.439546	0.860767	0.62 (0.44, 0.86)	0.0535327	1.02532	1.32829
5	5	5	chr15	71423356	71427046				-1	0.00474312	0.642645	0.472819	0.873469	0.64 (0.47, 0.87)	0.0535824	1.02429	1.32108
5	5	5	chr15	71420670	71423120				-1	0.0093844	0.634931	0.450697	0.894474	0.63 (0.45, 0.89)	0.0806635	1.00904	1.30335
6	6	6	chr17	42098064	42100474				-1	3.0556e-05	0.45871	0.318001	0.661679	0.46 (0.32, 0.66)	0.00802989	1.07358	1.48711
6	6	6	chr17	42097068	42097990				-1	3.3319e-05	0.501813	0.362324	0.695003	0.50 (0.36, 0.70)	0.00802989	1.07358	1.47998
6	6	6	chr17	42095337	42097009				-1	6.61919e-05	0.507739	0.36394	0.708355	0.51 (0.36, 0.71)	0.0136733	1.07037	1.46182
6	6	6	chr17	42093032	42094287				-1	0.00104576	0.619434	0.465182	0.824836	0.62 (0.47, 0.82)	0.0222378	1.05654	1.36503
7	7	7	chr19	15685213	15685925				-1	0.00125526	0.628046	0.473436	0.833147	0.63 (0.47, 0.83)	0.0238882	1.05338	1.35771
7	7	7	chr19	15686036	15688801				-1	0.00136195	0.646385	0.494896	0.844246	0.65 (0.49, 0.84)	0.0244013	1.04917	1.34821
7	7	7	chr19	15681763	15685139				-1	0.00281716	0.663337	0.506714	0.868371	0.66 (0.51, 0.87)	0.0387963	1.03355	1.32573
8	8	8	chr2	162136055	162136356				1	0.000488219	1.67496	1.25343	2.23823	1.67 (1.25, 2.24)	0.019489	1.06396	1.28044
8	8	8	chr2	162135070	162135249				1	0.000860457	1.60505	1.21517	2.12002	1.61 (1.22, 2.12)	0.0215868	1.05971	1.26458
9	9	9	chr5	34201715	34201852				1	0.00323051	1.91106	1.24186	2.94086	1.91 (1.24, 2.94)	0.0434092	1.03769	1.19333
9	9	9	chr5	34170829	34170949				1	0.00429992	1.90702	1.22436	2.97031	1.91 (1.22, 2.97)	0.0525551	1.02942	1.18127
10	10	10	chr6	72099739	72107969	Y			-1	0.00249961	0.523007	0.343577	0.796141	0.52 (0.34, 0.80)	0.036882	1.04498	1.35266
10	10	10	chr6	72092048	72099685	Y			-1	0.0044717	0.573387	0.390761	0.841366	0.57 (0.39, 0.84)	0.0527824	1.02737	1.33341
10	10	10	chr6	72082646	72084661	Y			-1	0.0051383	0.63751	0.465097	0.873836	0.64 (0.47, 0.87)	0.0562877	1.02327	1.32032
10	10	10	chr6	72090253	72091283	Y			-1	0.0100046	0.568758	0.370202	0.873808	0.57 (0.37, 0.87)	0.0845999	1.00803	1.3044
11	11	11	chr6	151715844	151717137				1	2.05095e-05	1.51019	1.24925	1.82565	1.51 (1.25, 1.83)	0.00802989	1.07037	1.32923
11	11	11	chr6	151717215	151718164				1	0.00782489	1.58553	1.1289	2.22688	1.59 (1.13, 2.23)	0.0724782	1.01308	1.18861
12	12	12	chr7	149668770	149669327				-1	0.000895719	0.600304	0.444209	0.811251	0.60 (0.44, 0.81)	0.0215868	1.05971	1.37512
12	12	12	chr7	149925596	149925704				-1	0.00326655	0.600614	0.42763	0.843571	0.60 (0.43, 0.84)	0.0434092	1.03458	1.34073
12	12	12	chr7	149699811	149700117				-1	0.00689155	0.644633	0.468808	0.886402	0.64 (0.47, 0.89)	0.0682547	1.01511	1.31049
13	13	13	chr8	12401386	12401654				-1	0.000215606	0.642339	0.508081	0.812074	0.64 (0.51, 0.81)	0.019489	1.06396	1.38224
13	13	13	chr8	12432626	12433347				-1	0.00237967	0.601027	0.432772	0.834698	0.60 (0.43, 0.83)	0.0354742	1.04185	1.34971
13	13	13	chr8	12403417	12403612				-1	0.00521705	0.621843	0.445569	0.867855	0.62 (0.45, 0.87)	0.0563294	1.02327	1.32331
14	14	14	chr9	134279738	134284311				-1	0.000945551	0.544601	0.37986	0.780787	0.54 (0.38, 0.78)	0.0217026	1.06078	1.38426
14	14	14	chr9	134271924	134274441				-1	0.00136688	0.562185	0.395146	0.799836	0.56 (0.40, 0.80)	0.0244013	1.05654	1.37163
14	14	14	chr9	134291733	134295852				-1	0.00825911	0.616306	0.430343	0.882628	0.62 (0.43, 0.88)	0.0751111	1.01106	1.30996
15	15	15	chrX	93652357	93666290	Y			-1	0.00618727	0.618535	0.438528	0.87243	0.62 (0.44, 0.87)	0.0630356	1.01918	1.31878
15	15	15	chrX	93688784	93693228	Y			-1	0.00612638	0.628686	0.451128	0.876129	0.63 (0.45, 0.88)	0.0630356	1.01918	1.31731
15	15	15	chrX	93669788	93672149	Y			-1	0.0067447	0.609469	0.425966	0.872024	0.61 (0.43, 0.87)	0.0677281	1.01613	1.31727
15	15	15	chrX	93666349	93667298	Y			-1	0.0133601	0.589919	0.388339	0.896138	0.59 (0.39, 0.90)	0.0995811	1	1.29405
16	16	16	chrX	93717247	93720845	Y			-1	0.00465607	0.612137	0.435735	0.859953	0.61 (0.44, 0.86)	0.0535824	1.02532	1.32837
16	16	16	chrX	93725918	93737489	Y			-1	0.00522001	0.619811	0.443084	0.867027	0.62 (0.44, 0.87)	0.0563294	1.02327	1.32367
16	16	16	chrX	93751305	93757302	Y			-1	0.00855339	0.63573	0.453558	0.891074	0.64 (0.45, 0.89)	0.0768211	1.01005	1.30606
16	16	16	chrX	93748573	93749757	Y			-1	0.0100756	0.627092	0.439504	0.894745	0.63 (0.44, 0.89)	0.0847054	1.00602	1.30222
16	16	16	chrX	93746612	93748536	Y			-1	0.0115434	0.634703	0.446036	0.903173	0.63 (0.45, 0.90)	0.0912119	1.003	1.29682
17	17	17	chrX	93772799	93777937	Y			-1	0.00939624	0.627079	0.440938	0.891798	0.63 (0.44, 0.89)	0.0806635	1.00904	1.30448
17	17	17	chrX	93778121	93784508	Y			-1	0.0114168	0.652106	0.468225	0.908202	0.65 (0.47, 0.91)	0.0912119	1.003	1.29424
18	18	18	chrX	93824387	93825877				-1	0.00563791	0.605963	0.425019	0.863942	0.61 (0.43, 0.86)	0.0590755	1.02224	1.32337
18	18	18	chrX	93830179	93833764				-1	0.00623381	0.613454	0.43223	0.870663	0.61 (0.43, 0.87)	0.0630356	1.01918	1.31927
0	19	19	chr4	14787521	14788354				-1	0.000323243	0.56595	0.414982	0.771839	0.57 (0.41, 0.77)	0.019489	1.06396	1.40958
0	19	20	chr3	27150797	27152817				-1	0.000566572	0.511106	0.348961	0.748592	0.51 (0.35, 0.75)	0.019489	1.06396	1.40131
0	19	21	chr16	30875605	30875752				-1	0.00036735	0.598576	0.451334	0.793854	0.60 (0.45, 0.79)	0.019489	1.06396	1.39578
0	19	22	chr4	39536187	39536524				-1	0.00018174	0.625811	0.489618	0.799887	0.63 (0.49, 0.80)	0.019489	1.06396	1.39528
0	19	23	chr14	81726879	81729708				-1	0.000939444	0.522986	0.356206	0.767855	0.52 (0.36, 0.77)	0.0217026	1.06184	1.38539
0	19	24	chr11	781048	781371				-1	0.00062398	0.608627	0.457932	0.808914	0.61 (0.46, 0.81)	0.0195562	1.06184	1.38049
0	19	25	chr12	57793185	57793823				1	0.000423527	1.49085	1.19399	1.86152	1.49 (1.19, 1.86)	0.019489	1.06184	1.2757
0	19	26	chr8	81525870	81526021				1	0.00237356	1.69574	1.20625	2.38387	1.70 (1.21, 2.38)	0.0354742	1.04289	1.22654
0	19	27	chr4	74877348	74877549				1	0.0027644	1.68574	1.19748	2.3731	1.69 (1.20, 2.37)	0.0384357	1.03769	1.22155
0	19	28	chr1	36798999	36802115				-1	0.00304732	0.600363	0.428386	0.84138	0.60 (0.43, 0.84)	0.04157	1.03562	1.3428
0	19	29	chr19	12378905	12380075				-1	0.00339694	0.582111	0.405299	0.836058	0.58 (0.41, 0.84)	0.0438569	1.03458	1.34184
0	19	30	chr21	9837324	9837442				1	0.0026988	1.49558	1.14976	1.94541	1.50 (1.15, 1.95)	0.0384357	1.03458	1.23045
0	19	31	chr3	123210205	123211948				1	0.00339228	1.72195	1.19709	2.47694	1.72 (1.20, 2.48)	0.0438569	1.03458	1.21033
0	19	32	chr8	12054779	12054926				-1	0.00358847	0.590603	0.414358	0.841813	0.59 (0.41, 0.84)	0.045517	1.03252	1.33927
0	19	33	chr11	63336814	63339112				-1	0.00382176	0.618081	0.446126	0.856314	0.62 (0.45, 0.86)	0.0480545	1.02942	1.33298
0	19	34	chr6	36575163	36576155				-1	0.00332184	0.718117	0.575712	0.895746	0.72 (0.58, 0.90)	0.0436671	1.02634	1.29219
0	19	35	chr14	38291258	38299693				-1	0.00440288	0.654432	0.488803	0.876185	0.65 (0.49, 0.88)	0.0526163	1.02532	1.31925
0	19	36	chr1	168218748	168220325				1	0.00439196	1.54639	1.14566	2.08729	1.55 (1.15, 2.09)	0.0526163	1.02532	1.21366
0	19	37	chr3	112414798	112415017				1	0.0049365	1.80109	1.19501	2.71454	1.80 (1.20, 2.71)	0.0544899	1.02532	1.18646
0	19	38	chr10	133732921	133733113				-1	0.00553418	0.635305	0.461093	0.875338	0.64 (0.46, 0.88)	0.0584118	1.02122	1.31881
0	19	39	chr3	195671271	195671479				1	0.00549672	1.54745	1.137	2.10609	1.55 (1.14, 2.11)	0.0584118	1.02122	1.20543
0	19	40	chr5	180678078	180680053				1	0.00681891	1.6518	1.14832	2.37602	1.65 (1.15, 2.38)	0.068001	1.01613	1.18808
0	19	41	chr10	29738073	29738359				-1	0.00621229	0.705859	0.549996	0.905892	0.71 (0.55, 0.91)	0.0630356	1.01511	1.2895
0	19	42	chr2	91816094	91819627		92272937		-1	0.00735305	0.625718	0.444106	0.881596	0.63 (0.44, 0.88)	0.0693105	1.0141	1.31236
0	19	43	chr15	39777520	39813177				-1	0.00738162	0.628377	0.447305	0.882747	0.63 (0.45, 0.88)	0.0693105	1.0141	1.31181
0	19	44	chr16	21527242	21527480				-1	0.00715017	0.677673	0.510375	0.899811	0.68 (0.51, 0.90)	0.0693105	1.0141	1.29935
0	19	45	chr1	222906688	222910172				1	0.00737961	1.55441	1.12571	2.14636	1.55 (1.13, 2.15)	0.0693105	1.0141	1.1936
0	19	46	chr20	3074943	3075062				1	0.00770285	1.66879	1.14505	2.43207	1.67 (1.15, 2.43)	0.0718601	1.0141	1.18101
0	19	47	chr15	50653452	50656894				1	0.00786935	1.48504	1.10939	1.9879	1.49 (1.11, 1.99)	0.0724782	1.01106	1.19541
0	19	48	chr11	8681526	8687251				-1	0.00850929	0.605821	0.417073	0.879988	0.61 (0.42, 0.88)	0.0768211	1.01005	1.30993
0	19	49	chr18	14274671	14274823				-1	0.00911875	0.586355	0.392555	0.875833	0.59 (0.39, 0.88)	0.079432	1.00904	1.30825
0	19	50	chr7	94189030	94190366				-1	0.00942748	0.602606	0.411121	0.883278	0.60 (0.41, 0.88)	0.0806635	1.00904	1.3066
0	19	51	chr19	56149766	56151179				-1	0.00958039	0.587297	0.392631	0.878479	0.59 (0.39, 0.88)	0.0814896	1.00904	1.30645
0	19	52	chr19	22021429	22024672	Y			-1	0.00908501	0.652789	0.473822	0.899353	0.65 (0.47, 0.90)	0.079432	1.00904	1.30076
0	19	53	chr10	42398467	42398655				1	0.00822203	1.36953	1.08464	1.72924	1.37 (1.08, 1.73)	0.0751111	1.00904	1.19323
0	19	54	chr1	15936663	15936819				1	0.00905011	1.52897	1.11156	2.10311	1.53 (1.11, 2.10)	0.079432	1.00904	1.18737
0	19	55	chr19	57811563	57811715				1	0.00905558	1.60614	1.12525	2.29255	1.61 (1.13, 2.29)	0.079432	1.00904	1.18041
0	19	56	chrX	115108909	115109012				1	0.0106958	1.63472	1.12085	2.38417	1.63 (1.12, 2.38)	0.0888859	1.00501	1.16995
0	19	57	chr10	38637965	38638108				-1	0.0109671	0.626541	0.437017	0.898257	0.63 (0.44, 0.90)	0.0890922	1.00401	1.29951
0	19	58	chr7	76741733	76741898				-1	0.0108366	0.654724	0.472675	0.906887	0.65 (0.47, 0.91)	0.0890323	1.00401	1.29524
0	19	59	chr2	96492560	96493149		96346106		-1	0.0109586	0.678862	0.503712	0.914915	0.68 (0.50, 0.91)	0.0890922	1.00401	1.28845
0	19	60	chr6	26130873	26132970				1	0.0108065	1.58017	1.1115	2.24645	1.58 (1.11, 2.25)	0.0890323	1.00401	1.17529
0	19	61	chr16	25271035	25272071				-1	0.0115221	0.610665	0.416518	0.895307	0.61 (0.42, 0.90)	0.0912119	1.003	1.29915
0	19	62	chr5	10435961	10438476				1	0.0115239	1.80794	1.14199	2.86224	1.81 (1.14, 2.86)	0.0912119	1.003	1.14644
0	19	63	chr16	31465709	31467707				-1	0.0127252	0.593317	0.393487	0.894628	0.59 (0.39, 0.89)	0.0979304	1.001	1.29594
0	19	64	chr9	33018805	33020959				-1	0.0127323	0.552649	0.346592	0.881213	0.55 (0.35, 0.88)	0.0979304	1.001	1.29365
0	19	65	chr17	3710044	3712797				-1	0.0123973	0.665942	0.484226	0.915851	0.67 (0.48, 0.92)	0.0968998	1.001	1.28873
0	19	66	chr1	121484124	121485310	Y			1	0.0126193	1.55948	1.09987	2.21115	1.56 (1.10, 2.21)	0.0979304	1.001	1.17052
0	19	67	chr17	41379297	41379450				-1	0.0128583	0.683666	0.506667	0.922499	0.68 (0.51, 0.92)	0.0983682	1	1.28277
0	19	68	chr6	138982087	138982527	Y	96346106		1	0.0130006	1.73186	1.12279	2.67133	1.73 (1.12, 2.67)	0.0983682	1	1.14943
0	19	69	chr1	11968187	11968792		119700011		1	0.0131033	1.77991	1.12871	2.80683	1.78 (1.13, 2.81)	0.0983682	1	1.14339
